1 Research Articles - JCM

2

3 **Performance assessment of Respiratory Viral ELITe MGB® assay for the quantitative**  
4 **detection of influenza A/B and respiratory syncytial viruses.**

5

6 Antonio Piralla,<sup>a\*</sup> Federica Giardina,<sup>a\*</sup> Alice Fratini,<sup>a</sup> Davide Sapia,<sup>a</sup> Francesca Rovida,<sup>a</sup> Fausto  
7 Baldanti<sup>a,b</sup>

8

9 Molecular Virology Unit, Microbiology and Virology Department, Fondazione I.R.C.C.S.  
10 Policlinico San Matteo, Pavia, Italy<sup>a</sup>; Department of Clinical-Surgical, Diagnostic and Pediatric  
11 Sciences, Università Degli Studi di Pavia, Pavia, Italy<sup>b</sup>

12

13 Running title: Multiplex assays for the quantification of FluA/B and RSV.

14

15 \*Antonio Piralla and Federica Giardina contributed equally to this article.

16

17 Address correspondence to Antonio Piralla, [a.piralla@smatteo.pv.it](mailto:a.piralla@smatteo.pv.it)

18

19 Text word: 1735

20 Abstract: 253 (max 250)

21

22 **Abstract**

23 Influenza (Flu) and respiratory syncytial virus (RSV) are responsible for lower respiratory tract  
24 infections (LRTIs) associated with significant hospitalization among young children. In the present  
25 study, the performances of a triplex PCR assay detecting Flu A/B and RSV were compared with our  
26 in-house single-plex assays using 160 stored respiratory specimens previously tested using a panel  
27 of laboratory-developed real-time RT-PCR. Of them, 61 were positive for FluA, 41 for FluB, and  
28 58 for RSV. All samples were retrospectively quantified with Respiratory Viral (RV) ELITE  
29 MGB® Panel (ELITechGroup Molecular Diagnostics, Puteaux, France) processed using ELITE  
30 InGenius® system. Overall, the total percentage agreement observed was 93.4% (57/61) for FluA,  
31 92.7% (38/41) for FluB, and 86.2% (50/58) for RSV. A significant correlation of VL values was  
32 observed between the two methods for FluA and RSV ( $\rho=0.91$  and  $0.84$ ). This finding was  
33 supported by the strength of agreement between the two methods, as showed by the linear  
34 regression analysis ( $R^2=0.84$  and  $0.80$ ). FluB viral load values measured by RV Panel were less  
35 significantly correlated ( $\rho=0.77$  and  $R^2=0.56$ ). The bland-Altman analysis showed how 84.2%  
36 (48/57) of FluA and 86.0% of RSV (43/50) samples fell within  $\pm 1.0$  Log<sub>10</sub> variation from our  
37 laboratory results, while only 21.1% (8/38) of FluB results fell within this range. The great majority  
38 of FluB samples (29/30) outside range had values higher than  $+1.0$  Log<sub>10</sub> (median  $+2.1$  Log<sub>10</sub>  
39 range  $+1.0$  to  $+3.5$  Log<sub>10</sub>). In conclusion, RV ELITE MGB® Panel constitutes a valid and robust  
40 system for simultaneous detection and quantification of Flu A/B and RSV.

41

42 *Keywords:* Multiplex PCR, Real-time, respiratory viruses, InGenius, Quantitative results.

43

44 Influenza viruses type A and B (Flu A/B) and respiratory syncytial virus (RSV) are responsible for  
45 lower respiratory tract infections (LRTIs) associated with significant hospitalization among young  
46 children, elderly and immunocompromised patients (1-5). The incidence, morbidity, and mortality  
47 of Flu as compared to RSV varies from season to season (6). A rapid diagnosis allowing an  
48 appropriate decision regarding treatment and/or improved cohorting and isolation strategies to  
49 prevent transmission is a major concern on respiratory virus infections (7-9). In fact, in the last  
50 decade, the introduction of nucleic acid amplification tests (NAATs) have shortened turnaround  
51 time (TAT) and increased sensitivity for respiratory viruses (10). Furthermore, the multiplex RT-  
52 PCR approach is a validated strategy to detect a large number of respiratory viruses (8).  
53 Quantitative NAATs have been useful in terms of monitoring the reduction of viral load and thus  
54 the clinical efficacy of specific therapy (11,12). Different viral load levels have been associated  
55 with a higher risk of complications and severe disease in adults and children (13-15). In addition,  
56 the determination of viral load for different viruses in co-infections could be useful to distinguish  
57 which virus is the real pathogen and which the bystander (16). All these issues have to be  
58 interpreted in the context of available clinical and diagnostic information in order to improve  
59 clinical management. However, the use of quantitative NAATs in the diagnosis of respiratory  
60 viruses has largely been debated.

61 In the present study, the performances of a triplex-PCR assay detecting and quantifying Flu A/B  
62 and RSV were compared with our laboratory developed single-plex assays using positive stored  
63 clinical specimens.

64

## 65 **MATERIAL AND METHODS**

66 **Study samples.** A total of 160 respiratory samples, stored at  $-80^{\circ}\text{C}$  in a universal transport  
67 medium (UTM<sup>TM</sup>, Copan Italia SpA, Brescia, Italy) and collected from December 2014 through  
68 April 2016 at the Molecular Virology Unit of the Fondazione IRCCS Policlinico San Matteo were  
69 included in this study. All samples were previously tested using a panel of laboratory-developed

70 assays (LDA) real-time RT-PCR as previously described (9). Of them, 61 were positive for Flu A,  
71 41 for Flu B and 58 RSV. Samples were categorized by viral load as high ( $>10^6$  RNA copies/ml),  
72 medium ( $10^4$ - $10^5$  RNA copies/ml) and low ( $10^2$ - $10^3$  RNA copies/ml). All samples were  
73 retrospectively quantified with Respiratory Viral ELITE MGB® Panel (ELITechGroup Molecular  
74 Diagnostics, Puteaux, France) processed using ELITE InGenius® system.

75

76 **Respiratory Viral ELITE MGB® Panel.** The archived respiratory samples were processed  
77 according to the manufacturer's protocol on InGenius, a completely automated cassette based  
78 sample-to-results solution combining a universal extraction and independently controlled Real-time  
79 PCR thermal cycler (ELITechGroup Molecular Diagnostics, Puteaux, France). Briefly, 200 ul of  
80 respiratory were carefully transferred into a dedicated tube and loaded on the InGenius instrument  
81 for testing. Finally, the InGenius instrument was supplied with extraction/amplification Internal  
82 Control (IC), the RV ELITE MGB amplification Master mix, and extraction and amplification  
83 cassette consumables provided by the manufacturer (ELITechGroup Molecular Diagnostics,  
84 Puteaux, France). Results interpretation was performed according to the instruction manual of the  
85 RV ELITE MGB® assay. Quantitative results expressed as  $\log_{10}$  RNA copies/ml were measured  
86 comparing the cycle threshold (Ct) values obtained and interpolated with a standard curve (serial  
87 dilutions of DNA plasmid) for FluA, FluB and RSV.

88

89 **Statistical analysis.** All viral RNA load (copies/ml) statistics were performed using  $\log_{10}$   
90 transformed viral load values. Quantitative variables were described as the mean and standard  
91 deviation, and/or median. Correlations between two quantitative variables were measured by the  
92 Spearman correlation test. The agreement between the assays was assessed with a Bland-Altman  
93 plot (17) and for graphical representation a  $\pm 0.5 \text{ Log}_{10}$  was considered an acceptable range of  
94 variability as also according to other publications (18). Descriptive statistics and linear regression  
95 lines were performed using Graph Pad Prism software (version 5.00.288). The correlation between

96 the quantitative results was computed as the concordance correlation coefficient (CCC) of the  
97 measurements, according to Lin (19) using MedCalc® software (Version 9.4.2.0).

98

## 99 **RESULTS**

100 A total of 160 respiratory samples with viral load ranging from 120 to 54574920 RNA  
101 copies/ml for FluA, from 180 to 31370040 RNA copies/ml for FluB and from 100 to 94513860  
102 RNA copies/ml were analysed. Overall, the total percentage agreement observed was 93.4% (57/61)  
103 for FluA, 92.7% (38/41) for FluB and 86.2% (50/58) for RSV (Table 1). In detail, all FluA- (4/61)  
104 and FluB-positive (3/41) samples not detected by RV ELITE MGB® Panel belonged to low viral  
105 load group ( $10^2$ - $10^3$  RNA copies/ml), with viral load ranging from 270 to 900 RNA/copies ml for  
106 FluA and from 225 to 900 RNA/copies ml for FluB. Among 8 (13.8%) RSV-positive samples  
107 resulted negative by RV ELITE MGB® Panel, 1 (1.7%) had medium viral load (25650 RNA/copies  
108 ml) and 7 (12.1%) had low viral load ranging from 180 to 810 RNA/copies ml.

109 Positive samples were stratified based on viral load into three groups named high, medium  
110 and low (Figure 1). Viral loads were comparable in samples included in the high ( $p=0.11$ ) and  
111 medium ( $p=0.84$ ) group for FluA as well as for RSV ( $p=0.07$  and  $p=0.74$ ) (Fig. 1A and 1C).  
112 Conversely, a significantly difference of viral load was observed for FluA and RSV in low viral  
113 load group (Fig. 1A and 1C;  $p<0.001$ ). For FluB samples, no difference in median viral load was  
114 observed in high group, while median viral load measured by RV ELITE MGB® Panel was greater  
115 in the medium and low groups (Fig. 2A,  $p<0.001$ ).

116 A significant correlation was observed between the LDA and RV ELITE MGB® Panel for  
117 FluA and RSV assays ( $\rho=0.91$  and  $0.84$ ) also supported by the strength of agreement observed by  
118 the linear regression analysis ( $R^2=0.84$  and  $0.80$ ) (Fig. 2A and 2C). In addition, the two assays  
119 showed good concordance, with a CCC of 0.86 (95% CI, 0.79 to 0.91) and 0.81 (95% CI, 0.70 to  
120 0.88) for FluA and RSV assays, respectively (Table 2). FluB viral load values measured by RV  
121 ELITE MGB® Panel were less significant correlated to those quantified by LDA ( $\rho=0.77$  and  $R^2$

122 =0.56). This finding was also confirmed by the low concordance with a CCC of 0.36 (95% CI, 0.22  
123 to 0.49).

124 A plot of the differences between  $\text{Log}_{10}$  values obtained with LDA and results obtained by  
125 RV ELITE MGB® Panel assay was reported using a Bland-Altman analysis. Overall, the mean  
126 difference between two assays were  $-0.09 (\pm 1.96 \text{ SD, range } -1.52 \text{ to } +1.34)$  for FluA,  $-1.58 (\pm 1.96$   
127  $\text{SD, range } -3.7 \text{ to } +0.54)$  for FluB, and  $-0.32 (\pm 1.96 \text{ SD, range } -1.77 \text{ to } +1.13)$  for RSV. Assuming  
128 that differences within  $\pm 0.5 \text{ log}_{10}$  from LDA results for RV ELITE MGB® Panel assay is the  
129 acceptable range, Bland-Altman analysis showed how 64.9% (37/57) of FluA and 64.0% of RSV  
130 (32/50) samples fell within  $\pm 0.5 \text{ Log}_{10}$  variation from LDA results, while only 15.8% (6/38) of FluB  
131 results fell within this range. Regarding values outside the range of acceptability (values  $>+0.5 \text{ log}_{10}$   
132 or  $<-0.5 \text{ log}_{10}$  difference), among results of FluA samples, 10/57 (17.5%) had had values  $>+0.5$   
133  $\text{log}_{10}$  difference (mean  $+0.88 \text{ Log}_{10}$  range  $+0.51 \text{ to } +1.46 \text{ Log}_{10}$ ), while 10/57 (17.5%) had values  
134  $<-0.5 \text{ log}_{10}$  difference (mean  $-1.30 \text{ Log}_{10}$  range  $-2.10 \text{ to } -0.61 \text{ Log}_{10}$ ). Among RSV samples, 3/50  
135 (6.0%) had values  $>+0.5 \text{ log}_{10}$  difference (mean  $+0.79 \text{ Log}_{10}$  range  $+0.61 \text{ to } +1.13 \text{ Log}_{10}$ ) and 15/50  
136 (30.0%) had values  $<-0.5 \text{ log}_{10}$  difference (mean  $-1.14 \text{ Log}_{10}$  range  $+3.25 \text{ to } -0.51 \text{ Log}_{10}$ ) (grey  
137 circle, Fig. 3A and 3C). Almost all (31/32) FluB samples outside the acceptability range had a viral  
138 load difference greater than  $-0.5 \text{ Log}_{10}$  (median  $-1.99 \text{ Log}_{10}$  range  $-0.80 \text{ to } -3.5 \text{ Log}_{10}$ ; Fig. 3B) as  
139 compared with our LDA. This means that overall RV ELITE MGB® Panel quantify 2  $\text{Log}_{10}$  more  
140 than LDA.

141

## 142 **DISCUSSION**

143 In the field of respiratory infections, a rapid and accurate diagnosis is needed for reducing  
144 unnecessary antibiotic usage, preventing transmission, and initiation of specific antiviral therapy  
145 (20, 21). In the past decades, the conventional diagnostics methods have been replaced by  
146 molecular assays also in the diagnosis of respiratory virus infections. Although, these assays have  
147 significantly reduced the turnaround time (TAT) to less than six hours, sometimes most of them

148 resulted as complex to perform. In this perspective, it was of great introduction the newly designed  
149 diagnostic platform easy to handle with a further reduction of TAT. In the present study, the ELITE  
150 InGenius® system has been evaluated using the Respiratory Viral ELITE MGB® Panel in terms of  
151 performances including the semi-quantification of respiratory samples.

152 The overall agreement of the RV ELITE MGB® Panel compared to LDT was 93.4%, 92.7%,  
153 and 86.2% for influenza A, influenza B, and RSV, respectively. These findings are in keeping with  
154 the results of other rapid molecular assays when compared to LDT (22, 23). The main discordant  
155 results were observed in samples with low viral load ( $< 3 \log_{10}$  RNA copies/ml). These results are  
156 commonly observed in comparison performed between multiplex syndromic PCR panels and single  
157 target LDT (24, 25). Linear regression showed good correlations between RV ELITE MGB® Panel  
158 and LDT for Flu A and RSV. Among Flu B samples, a greater viral load level with a median of 2  
159 Log<sub>10</sub> was observed using RV ELITE MGB® Panel.

160 RV ELITE MGB® Panel also provides a fully automated sample-to-result solution with a  
161 TAT of 2.5 hours for 12 samples but at this stage, only the panel does not include other respiratory  
162 pathogens. However, results of the present study encourage the availability of quantitative assays  
163 for respiratory virus detection but raise the question that also other respiratory viruses, such as  
164 rhinoviruses and parainfluenza viruses, could be included in a quantitative panel due to their  
165 increasing frequency of detection also in severe respiratory illness (26, 27).

166 Our study has a number of limitations. First, the RV ELITE MGB® Panel has been  
167 evaluated only in a series of previously tested-positive samples and therefore it could not be  
168 assessed an overall performance in terms of positive and negative predictive values. Our pilot study  
169 was mainly focused on the validation of the quantitative results obtained. It will be necessary, a  
170 more extended study should be performed, including also negative samples, in order to clarify the  
171 clinical impact of this sample-to-result solution within the laboratory workflow.

172 In conclusion, based on the data presented here, the robustness of quantification obtained by  
173 the RV ELITE MGB® Panel was demonstrated. Only a few samples with very low viral load have

174 not been detected by the new direct RV ELITe MGB® Panel assay described herein is a powerful  
175 tool for rapid and simple molecular diagnosis of seasonal influenza as well as RSV.

176

## 177 **ACKNOWLEDGMENTS**

178 The authors would like to thank Daniela Sartori for manuscript editing. Financial support and  
179 reagents were provided by ELITechGroup Molecular Diagnostics (Torino, Italy). The funding  
180 organization played no role in the collection, management, analysis, and interpretation of the data;  
181 or preparation, review, and approval of the manuscript.



## 182 **References**

- 183 1. Malosh RE, Martin ET, Ortiz JR, Monto AS. 2018. The risk of lower respiratory tract infection  
184 following influenza virus infection: a systematic and narrative review. *Vaccine* **36**:141-147.  
185 <https://doi.org/10.1016/j.vaccine.2017.11.018>
- 186 2. Branche AR, Falsey AR. 2015. Respiratory syncytial virus infection in older adults: an under-  
187 recognized problem. *Drugs Aging*, 32:261-269. <https://doi.org/10.1007/s40266-015-0258-9>.
- 188 3. Hakim H, Dallas R, Zhou Y, Pei D, Cheng C, Flynn PM, Pui CH, Jeha S. 2016. Acute  
189 respiratory infections in children and adolescents with acute lymphoblastic leukemia. *Cancer*,  
190 **122**:798-805. <https://doi.org/10.1002/cncr.29833>.
- 191 4. Waghmare A, Campbell AP, Xie X, Seo D, Kuypers J, Leisenring W, Jerome KR, Englund JA,  
192 Boeckh M. 2013. Respiratory syncytial virus lower respiratory disease in hematopoietic cell  
193 transplant recipients: viral RNA detection in blood, antiviral treatment, and clinical outcomes.  
194 *Clin Infect Dis* **57**:1731-1741. <https://doi.org/10.1093/cid/cit639>.
- 195 5. Hijano DR, Maron G, Hayden RT. 2018. Respiratory Viral Infections in Patients With Cancer  
196 or Undergoing Hematopoietic Cell Transplant. *Front Microbiol* **9**:3097.  
197 <https://doi.org/10.3389/fmicb.2018.03097>.
- 198 6. Kwon YS, Park SH, Kim MA, Kim HJ, Park JS, Lee MY, Lee CW, Dauti S, Choi WI. 2017  
199 Risk of mortality associated with respiratory syncytial virus and influenza infection in adults.  
200 *BMC Infect Dis* **17**:785. <https://doi.org/10.1186/s12879-017-2897-4>.
- 201 7. Beckmann C, Hirsch HH. 2015. Diagnostic performance of near-patient testing for influenza. *J*  
202 *Clin Virol* **67**:43-46. <https://doi.org/10.1002/jmv.24492>.
- 203 8. Hirsch HH, Martino R, Ward KN, Boeckh M, Einsele H, Ljungman P. 2013. Fourth european  
204 conference on infections in leukaemia (ECIL-4): guidelines for diagnosis and treatment of  
205 human respiratory syncytial virus, parainfluenza virus, metapneumovirus, rhinovirus, and  
206 corona-virus. *Clin Infect Dis* **56**:258-266. <https://doi.org/10.1093/cid/cis844>.

- 207 9. Piralla A, Lunghi G, Percivalle E, Viganò C, Nasta T, Pugini L, Mosca F, Stronati M, Torresani  
208 E, Baldanti F. 2014. FilmArray® respiratory panel performance in respiratory samples from  
209 neonatal care units. *Diagn Microbiol Infect Dis.* 79(2):183-6.  
210 <https://doi.org/10.1016/j.diagmicrobio.2014.02.010>.
- 211 10. Ginocchio CC, Zhang F, Malhotra A, Manji R, Sillekens P, Foolen H, Overdyk M, Peeters M.  
212 2009. Evaluation of multiple test methods for the detection of the novel 2009 influenza A  
213 (H1N1) during the New York City outbreak. **45**:191-195.  
214 <https://doi.org/10.1128/JCM.43.6.2616-2623.2005>.
- 215 11. Lee N, Chan MC, Lui GC, Li R, Wong RY, Yung IM, Cheung CS, Chan EC, Hui DS, Chan  
216 PK. 2015. High Viral Load and Respiratory Failure in Adults Hospitalized for Respiratory  
217 Syncytial Virus Infections. *J Infect Dis.* 212:1237-1240. <https://doi.org/10.1093/infdis/jiv248>.
- 218 12. Khanna N, Widmer AF, Decker M, Steffen I, Halter J, Heim D, Weisser M, Gratwohl A,  
219 Fluckiger U, Hirsch HH. 2008. Respiratory syncytial virus infection in patients with  
220 hematological diseases: single-center study and review of the literature. *Clin Infect Dis.*  
221 46(3):402-12. <https://doi.org/10.1086/525263>.
- 222 13. Hasegawa K, Jartti T, Mansbach JM, Laham FR, Jewell AM, Espinola JA, Piedra PA, Camargo  
223 CA Jr. 2015. Respiratory syncytial virus genomic load and disease severity among children  
224 hospitalized with bronchiolitis: multicenter cohort studies in the United States and Finland. *J*  
225 *Infect Dis.* 211:1550-9. <https://doi.org/10.1093/infdis/jiu658>.
- 226 14. Kim YJ, Guthrie KA, Waghmare A, Walsh EE, Falsey AR, Kuypers J, Cent A, Englund JA,  
227 Boeckh M. 2014. Respiratory syncytial virus in hematopoietic cell transplant recipients: factors  
228 determining progression to lower respiratory tract disease. *J. Infect. Dis.* 209, 1195–1204.  
229 <https://doi.org/10.1093/infdis/jit832>.
- 230 15. DeVincenzo JP1, Wilkinson T, Vaishnav A, Cehelsky J, Meyers R, Nochur S, Harrison L,  
231 Meeking P, Mann A, Moane E, Oxford J, Pareek R, Moore R, Walsh E, Studholme R, Dorsett  
232 P, Alvarez R, Lambkin-Williams R. 2010. Viral load drives disease in humans experimentally

- 233 infected with respiratory syncytial virus. *Am J Respir Crit Care Med.* 182(10):1305-14.  
234 <https://doi.org/10.1164/rccm.201002-0221OC>.
- 235 16. Martin ET, Kuypers J, Wald A, Englund JA. 2012. Multiple versus single virus respiratory  
236 infections: viral load and clinical disease severity in hospitalized children. *Influenza Other*  
237 *Respir Viruses.* 6(1):71-7. <https://doi.org/10.1111/j.1750-2659.2011.00265.x>.
- 238 17. Bland JM, Altman DG. 1986. Statistical methods for assessing agreement between two  
239 methods of clinical measurement. *Lancet* 1(8476):307-10.
- 240 18. Pang XL, Fox JD, Fenton JM, Miller GG, Caliendo AM, Preiksaitis JK; American Society of  
241 Transplantation Infectious Diseases Community of Practice; Canadian Society of  
242 Transplantation. 2009. Interlaboratory comparison of cytomegalovirus viral load assays. *Am J*  
243 *Transplant.* 9(2):258-68. <https://doi.org/10.1111/j.1600-6143.2008.02513.x>.
- 244 19. Lin LI. 1989. A concordance correlation coefficient to evaluate reproducibility. *Biometrics*  
245 45:255–268.
- 246 20. Shah S, Bourgeois F, Mannix R, Nelson K, Bachur R, Neuman MI. 2016. Emergency  
247 department management of febrile respiratory illness in children. *Pediatr Emerg Care* 32:429–  
248 34. <https://doi.org/10.1097/PEC.0000000000000721>.
- 249 21. Klepser DG, Corn CE, Schmidt M, Dering-Anderson AM, Klepser ME. 2015. Health care  
250 resource utilization and costs for influenza-like illness among midwestern health plan members.  
251 *J Manag Care Spec Pharm.* 21:568–73. <https://doi.org/10.18553/jmcp.2015.21.7.568>.
- 252 22. Popowitch EB, Miller MB. 2018. Comparison of the Xpert Flu/RSV XC and Xpress Flu/RSV  
253 Assays. *J Clin Microbiol.* 56(8): e00278-18. <https://doi.org/10.1128/JCM.00278-18>.
- 254 23. Voermans JJC, Mulders DGJC, Pas SD, Koopmans MPG, van der Eijk AA, Molenkamp R.  
255 2020. Performance evaluation of the Panther Fusion® respiratory tract panel. *J Clin Virol.*  
256 123:104232. <https://doi.org/10.1016/j.jcv.2019.104232>.
- 257 24. Bruning AHL, Leeftang MMG, Vos JMBW, Spijker R, de Jong MD, Wolthers KC, Pajkrt D.  
258 2017. Rapid Tests for Influenza, Respiratory Syncytial Virus, and Other Respiratory Viruses: A

- 259        Systematic Review and Meta-analysis. *Clin Infect Dis.* 65(6):1026–1032.  
260        <https://doi.org/10.1093/cid/cix461>.
- 261 25. Ramanan P, Bryson AL, Binnicker MJ, Pritt BS, Patel R. 2017. Syndromic Panel-Based  
262 Testing in Clinical Microbiology. *Clin Microbiol Rev.* 31(1):e00024-17.  
263        <https://doi.org/10.1128/CMR.00024-17>.
- 264 26. Das D, Le Floch H, Houhou N, Epelboin L, Hausfater P, Khalil A, Ray P, Duval X, Claessens  
265 Y-E, Leport C, ESCAPED Study Group. 2015. Viruses detected by systematic multiplex  
266 polymerase chain reaction in adults with suspected community-acquired pneumonia attending  
267 emergency departments in France. *Clin Microbiol Infect* 21:608.e1–8.23.  
268        <https://doi.org/10.1016/j.cmi.2015.02.014>.
- 269 27. Dunn JJ, Miller MB. 2014 Emerging respiratory viruses other than influenza. *Clin Lab Med*  
270 34:409–30. <https://doi.org/10.1016/j.cll.2014.02.011>.

271

272

273 **Figure legend**

274 **Figure 1.** Comparison of the viral load measured with LDA (white circle) and RV ELITE MGB®  
275 Panel (black circle) for influenza A (A), influenza B (B) and RSV (C).

276

277 **Figure 2.** Linear regression analysis of log transformed viral load measured by LDA vs RV ELITE  
278 MGB® Panel assays for influenza A (A), influenza B (B) and RSV (C). Dashed red lines show the  
279 95% confidence interval of the regression line (red line). Samples with undetectable results with RV  
280 ELITE MGB® Panel are reported with a grey circle.

281

282 **Figure 3.** Bland Altman analysis was performed to compare the viral load ( $\text{Log}_{10}$  difference)  
283 measured by the two methods, LDA and RV ELITE MGB® Panel assay, for influenza A (A),  
284 influenza B (B) and RSV (C). The acceptability range (+0.5 to -0.5  $\text{Log}_{10}$  difference) is shaded in  
285 light grey and mean value is reported with a dotted line. Data outside the acceptability range are  
286 reported with a grey circle.

287

288 **TABLE 1 Cross table of clinical performance study.**

| Assay | Virus target    | Samples viral load category    | RV ELITe MGB® results |     |       | % agreement |
|-------|-----------------|--------------------------------|-----------------------|-----|-------|-------------|
|       |                 |                                | pos                   | neg | total |             |
| LDA   | Flu A<br>(n=61) | high viral load <sup>a</sup>   | 26                    | 0   | 26    | 100.0%      |
|       |                 | medium viral load <sup>b</sup> | 17                    | 0   | 17    | 100.0%      |
|       |                 | low viral load <sup>c</sup>    | 14                    | 4   | 18    | 77.7%       |
|       |                 | Total                          | 57                    | 4   | 61    | 93.4%       |
|       | Flu B<br>(n=41) | high viral load <sup>a</sup>   | 11                    | 0   | 11    | 100.0%      |
|       |                 | medium viral load <sup>b</sup> | 14                    | 0   | 14    | 100.0%      |
|       |                 | low viral load <sup>c</sup>    | 13                    | 3   | 16    | 81.3%       |
|       |                 | Total                          | 38                    | 3   | 41    | 92.7%       |
|       | RSV<br>(n=58)   | high viral load <sup>a</sup>   | 13                    | 0   | 13    | 100.0%      |
|       |                 | medium viral load <sup>b</sup> | 22                    | 1   | 23    | 95.7%       |
|       |                 | low viral load <sup>c</sup>    | 15                    | 7   | 22    | 68.2%       |
|       |                 | Total                          | 50                    | 8   | 58    | 86.2%       |

LDA, laboratory developed assay; influenza A, Flu A; influenza B, Flu B; positive, pos; negative, neg

<sup>a</sup>>10<sup>6</sup> copies/ml

<sup>b</sup>10<sup>4</sup>-10<sup>5</sup> copies/ml

<sup>c</sup>10<sup>2</sup>-10<sup>3</sup> copies/ml

289

290 **TABLE 2. Results obtained from statistical analyses of two methods comparisons.**

| Methods comparison                     | LDT vs RV ELITe MGB® Panel |             |       |
|----------------------------------------|----------------------------|-------------|-------|
|                                        | Influenza A                | Influenza B | RSV   |
| Arithmetic mean (95% CI <sup>a</sup> ) | -0.09                      | -1.58       | -0.33 |
| Lower limit                            | -2.10                      | -3.50       | -3.25 |
| Upper limit                            | +1.46                      | +1.38       | +1.13 |
| SD                                     | 0.73                       | 1.08        | 0.74  |
| Concordance correlation coefficient    | 0.86                       | 0.36        | 0.81  |
| Person ρ (precision)                   | 0.89                       | 0.75        | 0.84  |

Confidence interval, CI; standard deviation, SD

291

292

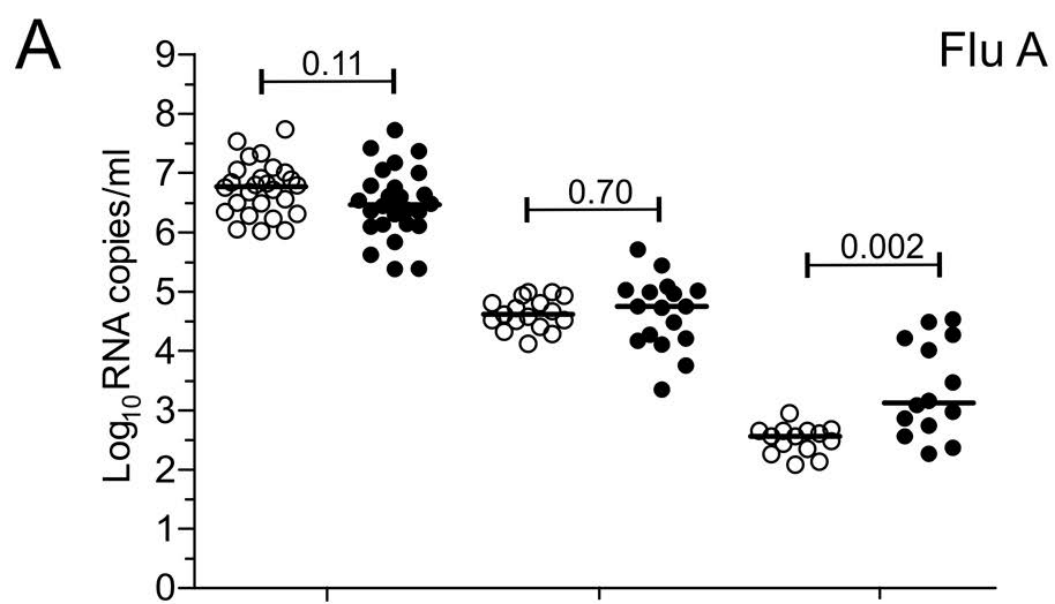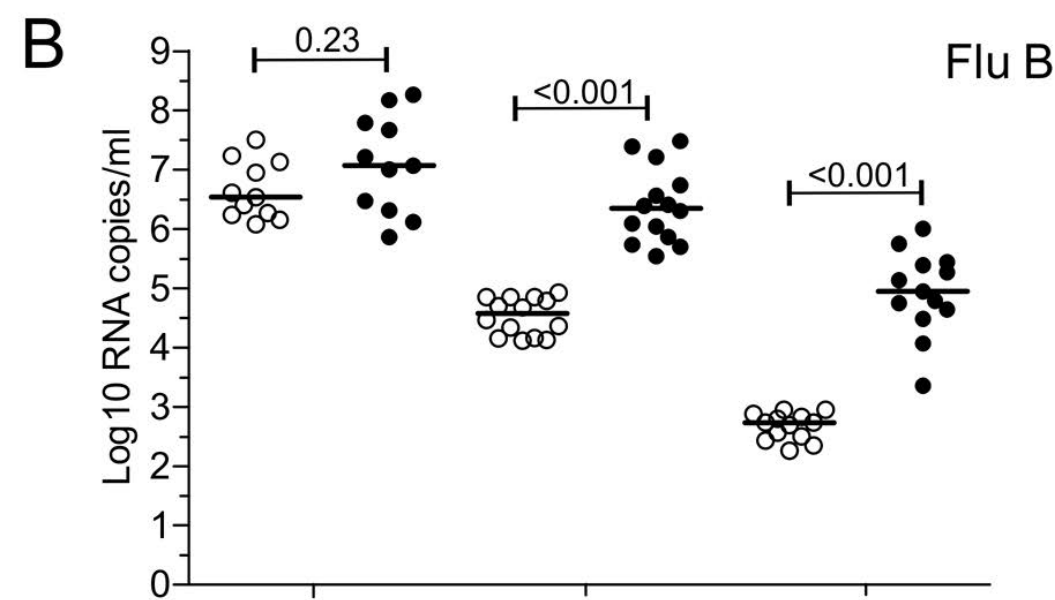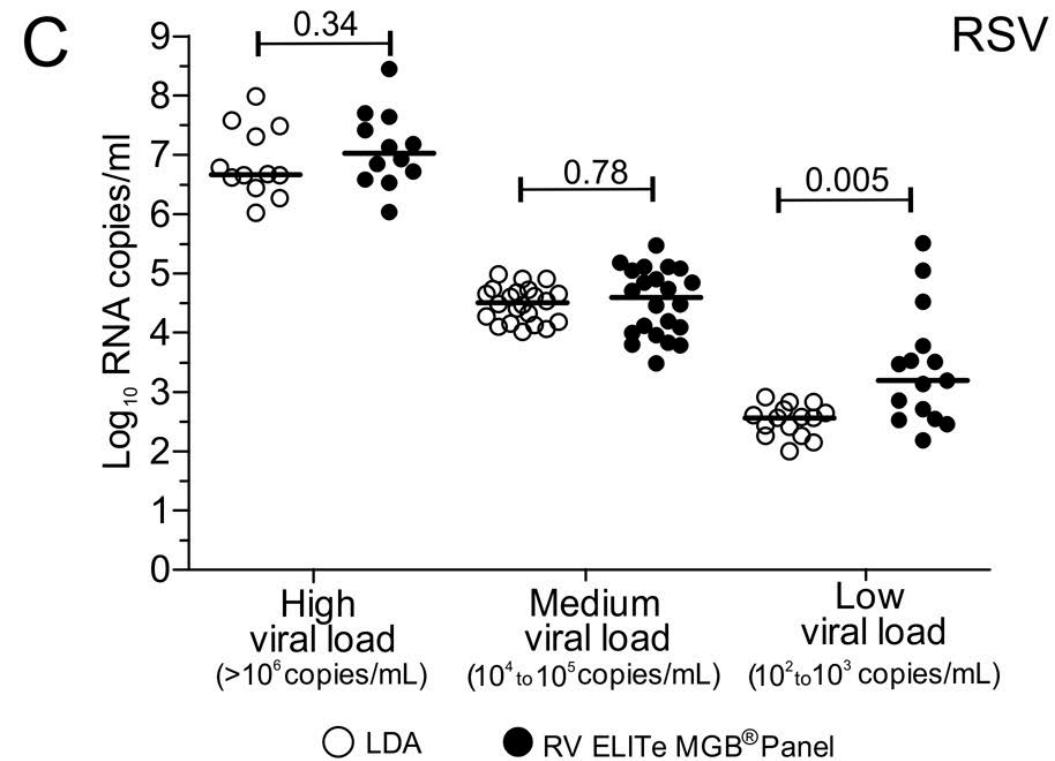

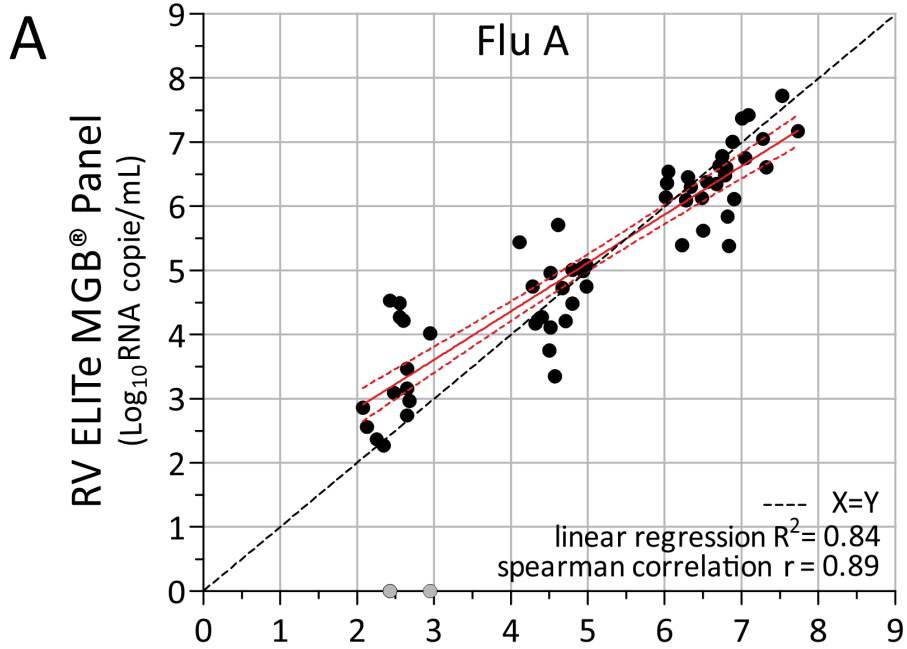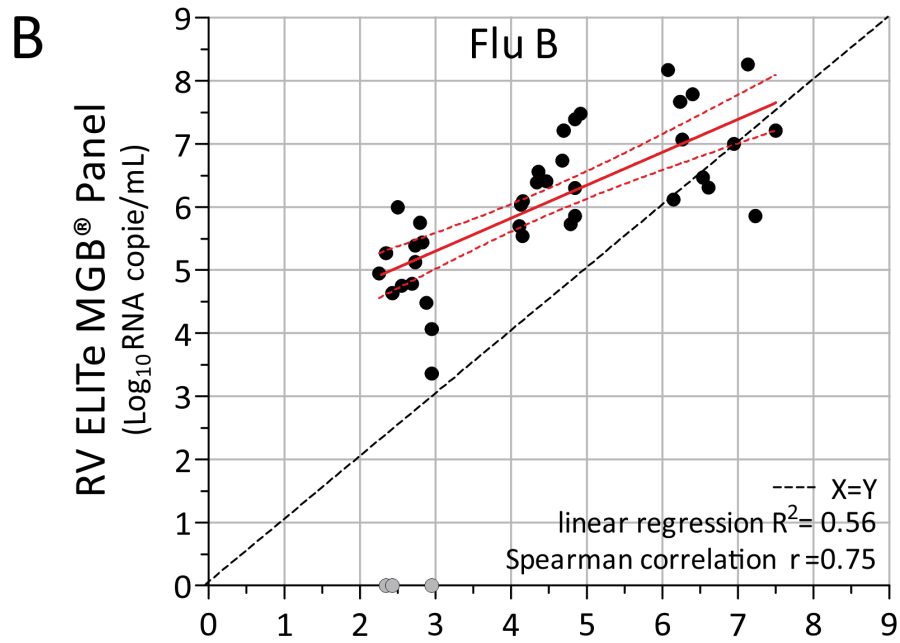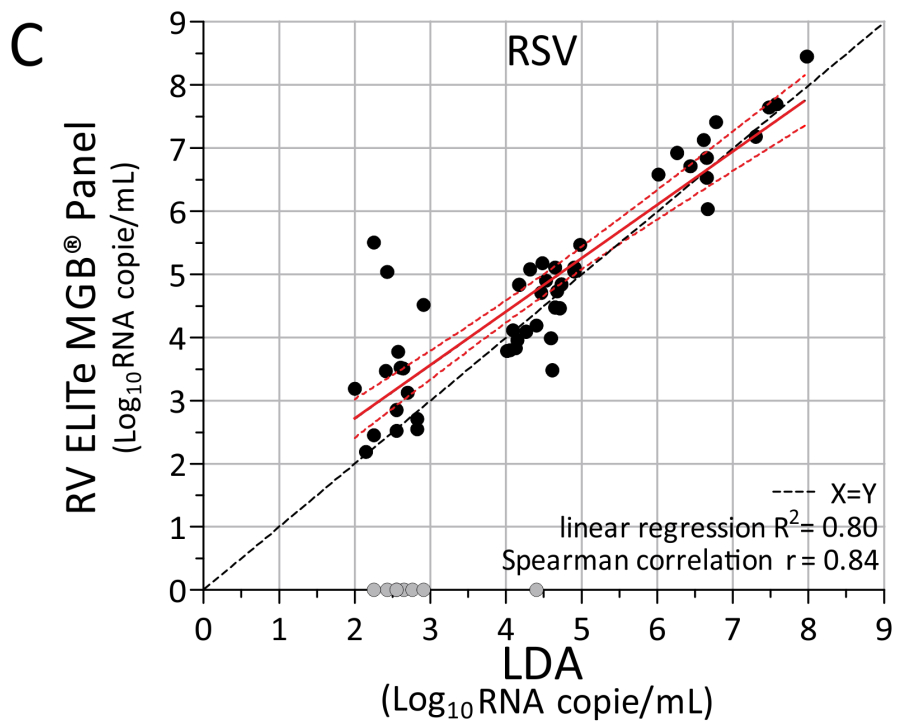



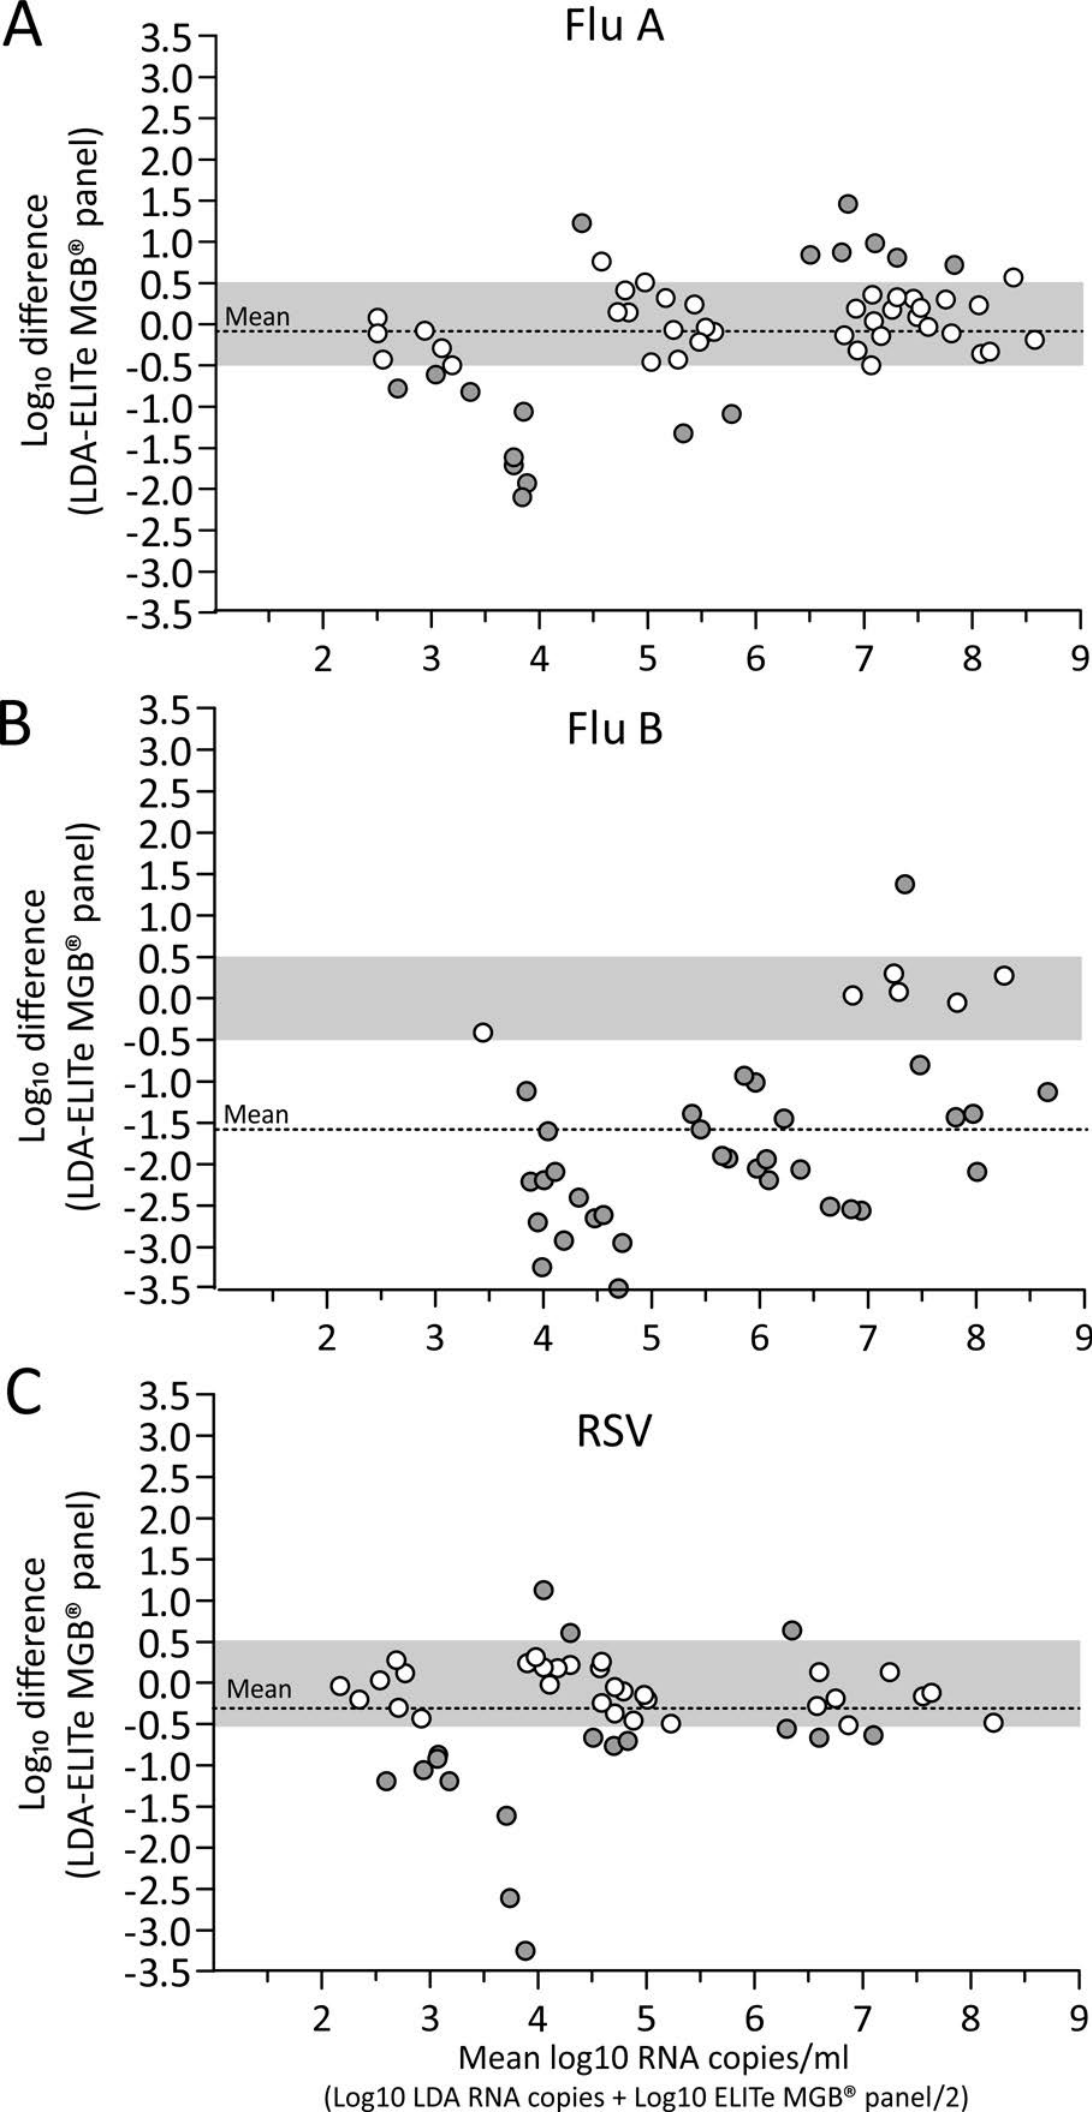

Source: https://www.biorxiv.org/content/biorxiv/early/2020/05/16/2020.05.14.097303.full.pdf
